# Supplementary material for: Species Distribution Pattern and Their Contribution in Plant Community Assembly in Response to Ecological Gradients of the Ecotonal Zone in the Himalayan Region
Source: MDPI journal article supplement (doi:10.3390/plants10112372), 2021-11-04
Supplement: s1 [file s1]

**Table S1.** List of plant species with their Importance values (IV) calculated based on vegetative characteristics of each sampling sites.

| Species            | Sampling sites |      |      |      |      |      |      |
|--------------------|----------------|------|------|------|------|------|------|
|                    | S1             | S2   | S3   | S4   | S5   | S6   | S7   |
| <i>Ach asp</i>     | 2.74           | 0.57 | 2.46 | 0    | 0    | 0    | 0    |
| <i>Ach bid</i>     | 0              | 1.38 | 0    | 0    | 0    | 0    | 0    |
| <i>Adi cap-ven</i> | 3.04           | 1.73 | 1.86 | 1.73 | 0    | 0    | 0    |
| <i>Adi ind</i>     | 2.54           | 0    | 1.93 | 0    | 0    | 0    | 0    |
| <i>Ail alt</i>     | 0              | 0    | 0    | 10.5 | 0.28 | 1.74 | 5.78 |
| <i>Ama vir</i>     | 1.47           | 0    | 1.01 | 2.47 | 0    | 0    | 0    |
| <i>Ana arv</i>     | 3.76           | 2.51 | 2.06 | 0    | 0    | 0    | 0    |
| <i>Arc min</i>     | 3.64           | 2.52 | 2.78 | 0    | 0    | 0    | 0    |
| <i>Art abs</i>     | 3.27           | 1.88 | 2.63 | 0    | 0    | 0    | 0.99 |
| <i>Ber cil</i>     | 0              | 0    | 2.19 | 0    | 0    | 0    | 0    |
| <i>Ber lyc</i>     | 0              | 4.54 | 8.43 | 0    | 0    | 0    | 0    |
| <i>Ber par</i>     | 0              | 0    | 3.29 | 0    | 0    | 0    | 0    |
| <i>Bis amp</i>     | 15.43          | 7.26 | 2.01 | 0    | 0    | 0    | 0    |
| <i>Bro dia</i>     | 0              | 0    | 3.72 | 0    | 0    | 0    | 0    |
| <i>Bro sec</i>     | 0              | 4.28 | 6.34 | 4.27 | 0    | 0    | 0    |
| <i>Bro tec</i>     | 0              | 3.17 | 2.94 | 2.75 | 0    | 0    | 0    |
| <i>Bup nig</i>     | 0              | 0    | 7.63 | 0    | 0    | 0    | 0    |
| <i>Can sat</i>     | 0              | 0    | 0    | 2.3  | 0    | 0    | 0    |
| <i>Cap bur-pas</i> | 3.65           | 2.63 | 1.74 | 2.83 | 0    | 0    | 0    |
| <i>Car sp</i>      | 3.76           | 0    | 0    | 0    | 0    | 0    | 0    |
| <i>Che alb</i>     | 3.84           | 1.72 | 1.25 | 2.87 | 0    | 0    | 0.49 |
| <i>Cic int</i>     | 2.76           | 0    | 0    | 0    | 0    | 0    | 0    |
| <i>Cir arv</i>     | 4.26           | 0    | 2.78 | 0    | 0    | 0    | 0    |
| <i>Cle gra</i>     | 7.36           | 5.38 | 2.73 | 0    | 0    | 0    | 0    |
| <i>Cli vul</i>     | 3.73           | 2.47 | 3.54 | 4.36 | 0    | 0    | 0.73 |
| <i>Com ben</i>     | 2.37           | 0    | 0    | 0    | 0    | 0    | 0    |
| <i>Con arv</i>     | 0              | 0    | 2.01 | 3.65 | 0    | 0    | 0    |
| <i>Con jap</i>     | 2.83           | 0.43 | 3.23 | 1.09 | 0    | 0    | 1.01 |
| <i>Cot acu</i>     | 0              | 0    | 0    | 0    | 1.38 | 1.75 | 0    |
| <i>Cro sp</i>      | 2.09           | 0    | 0    | 0    | 0    | 1.59 | 0    |
| <i>Cus ref</i>     | 4.82           | 2.54 | 1.85 | 2.54 | 0    | 0    | 0    |
| <i>Cyn ape</i>     | 0              | 0    | 0    | 2.47 | 0    | 0    | 0    |

|                |       |      |       |       |       |       |       |
|----------------|-------|------|-------|-------|-------|-------|-------|
| <i>Cyn dac</i> | 1.93  | 5.24 | 3.54  | 3.76  | 1.05  | 0.85  | 2.78  |
| <i>Cyn glo</i> | 3.87  | 2.06 | 3.18  | 4.83  | 0     | 0     | 0     |
| <i>Cyn mic</i> | 2.95  | 1.83 | 2.63  | 3.78  | 0     | 0     | 0     |
| <i>Cyp odo</i> | 0     | 0.76 | 0.38  | 0     | 0     | 0     | 0     |
| <i>Cyp rot</i> | 3.73  | 0    | 2.64  | 0     | 0     | 0     | 0     |
| <i>Dap muc</i> | 0     | 0    | 3.85  | 0     | 0     | 0     | 0     |
| <i>Dic bup</i> | 5.26  | 2.18 | 3.01  | 0     | 0     | 0     | 0     |
| <i>Dod vis</i> | 1.85  | 2.57 | 0     | 0     | 0     | 0     | 0     |
| <i>Duc ind</i> | 0     | 2.37 | 2.63  | 0     | 0     | 0     | 0     |
| <i>Dys amb</i> | 3.52  | 2.73 | 3.7   | 2.92  | 0     | 0     | 0     |
| <i>Eri can</i> | 4.02  | 2.31 | 0.56  | 0.46  | 0.76  | 0.18  | 2.97  |
| <i>Eup hel</i> | 3.27  | 2.84 | 3.06  | 2.04  | 0     | 0     | 0     |
| <i>Eup hir</i> | 2.71  | 0    | 2.64  | 0     | 0     | 0     | 0     |
| <i>Eup pro</i> | 2.31  | 2.01 | 0.67  | 1.9   | 0     | 0     | 0     |
| <i>Fic car</i> | 0     | 0    | 0     | 1.87  | 0     | 0     | 0     |
| <i>Fra hoo</i> | 0     | 0    | 0     | 1.04  | 0     | 0     | 0     |
| <i>Fra nub</i> | 4.02  | 3.72 | 0     | 0     | 0     | 0     | 0     |
| <i>Fra xan</i> | 0     | 0    | 3.58  | 0     | 0     | 0     | 0     |
| <i>Fum ind</i> | 2.16  | 3.51 | 2.85  | 2.87  | 0     | 0     | 0     |
| <i>Gal apa</i> | 0     | 3.42 | 2.61  | 0     | 0     | 1.84  | 0     |
| <i>Ger nep</i> | 4.26  | 0    | 0     | 0     | 0     | 0     | 0     |
| <i>Ger wal</i> | 5.27  | 0    | 0     | 0     | 0     | 0     | 0     |
| <i>Imp bic</i> | 0     | 6.27 | 3.24  | 0     | 0     | 0     | 0     |
| <i>Ind heb</i> | 10.62 | 3.25 | 5.58  | 0     | 0     | 0     | 0     |
| <i>Ind het</i> | 17.25 | 8.17 | 10.32 | 13.63 | 19.88 | 8.04  | 16.53 |
| <i>Ipo nil</i> | 0     | 0    | 2.95  | 0     | 0     | 0     | 0     |
| <i>Iso rug</i> | 1.01  | 4.28 | 2.4   | 5.86  | 0.67  | 2.06  | 0     |
| <i>Jas hum</i> | 0     | 5.38 | 0     | 0     | 0     | 0     | 0     |
| <i>Jug reg</i> | 0     | 0    | 5.63  | 0     | 0     | 0     | 0     |
| <i>Lau pro</i> | 0     | 0    | 0     | 0     | 0     | 0     | 0.76  |
| <i>Lep chi</i> | 0     | 0    | 0     | 0     | 25.72 | 19.73 | 18.65 |
| <i>Lep vir</i> | 0     | 0    | 0     | 2.58  | 4.21  | 0.32  | 0.72  |
| <i>Lin sp</i>  | 0     | 0    | 4.73  | 0     | 0     | 0     | 0     |
| <i>Mal cor</i> | 0     | 0    | 1.37  | 0     | 0     | 0     | 0     |
| <i>Mal par</i> | 0.85  | 0    | 0     | 0     | 0     | 0     | 0.47  |
| <i>Mal neg</i> | 2.01  | 0    | 0     | 0     | 0     | 0     | 0.73  |
| <i>Med sat</i> | 3.05  | 0    | 3.1   | 0     | 0.19  | 0     | 0.84  |

|                 |       |      |      |      |      |       |       |
|-----------------|-------|------|------|------|------|-------|-------|
| <i>Mic bif</i>  | 0     | 0    | 0    | 5.78 | 6.85 | 10.67 | 0     |
| <i>Oen ros</i>  | 3.78  | 0    | 0    | 0    | 0    | 0     | 0     |
| <i>Oxa cor</i>  | 2.13  | 1.08 | 0.54 | 0.86 | 0    | 0     | 0.78  |
| <i>Par hys</i>  | 0     | 0    | 0    | 4.63 | 0    | 0     | 0     |
| <i>Par jac</i>  | 13.26 | 9.66 | 4.63 | 8.64 | 0    | 0     | 0     |
| <i>Pen ori</i>  | 0     | 0    | 3.07 | 0    | 0    | 0     | 0     |
| <i>Per cap</i>  | 2.06  | 1.85 | 2    | 1.85 | 0    | 0     | 0     |
| <i>Pim ste</i>  | 7.34  | 2.85 | 0    | 2.85 | 0    | 0     | 0     |
| <i>Pla lan</i>  | 0     | 0    | 0    | 0    | 0.21 | 0     | 1.04  |
| <i>Pla maj</i>  | 0     | 0    | 3.06 | 0    | 0    | 0     | 0     |
| <i>Poa ann</i>  | 0     | 4.23 | 2.53 | 2.23 | 0    | 0     | 0     |
| <i>Poa inf</i>  | 0     | 6.26 | 2.38 | 3.17 | 0    | 0     | 0     |
| <i>Que inc</i>  | 0     | 0    | 2.1  | 0    | 20.1 | 12.5  | 14.7  |
| <i>Pyr pas</i>  | 0     | 4.36 | 3.52 | 4.01 | 0    | 0     | 0     |
| <i>Rum den</i>  | 0     | 0    | 2.84 | 0    | 0    | 0     | 0     |
| <i>Rum nep</i>  | 0     | 0    | 3.32 | 0    | 0    | 0     | 0     |
| <i>Sal alb</i>  | 0     | 0    | 1.85 | 0    | 0    | 0     | 0     |
| <i>Sil con</i>  | 0     | 0    | 3.64 | 0    | 0    | 0     | 0     |
| <i>Sol nig</i>  | 0     | 0    | 0    | 0    | 0    | 0     | 1.84  |
| <i>Sol sur</i>  | 0     | 0    | 0    | 0    | 0.84 | 0     | 1.46  |
| <i>Son asp</i>  | 0     | 0    | 0    | 0    | 0.18 | 0     | 0.87  |
| <i>Sor hal</i>  | 0     | 0    | 0    | 0    | 0    | 0     | 1.72  |
| <i>Sorb tom</i> | 0     | 2.86 | 5.64 | 2.86 | 0    | 0     | 1.93  |
| <i>Tar cam</i>  | 0     | 0    | 2.64 | 0    | 0    | 0     | 0     |
| <i>Tri rep</i>  | 1.05  | 1.73 | 2.75 | 1.73 | 0    | 0     | 0.58  |
| <i>Uro pan</i>  | 0     | 4.02 | 5.62 | 4.02 | 0    | 0     | 0     |
| <i>Ver tha</i>  | 0     | 0    | 0    | 0    | 0.11 | 0     | 0.93  |
| <i>Ziz sp</i>   | 0     | 0    | 0    | 0    | 31   | 44.45 | 13.04 |

**Table S2.** Means of ecological gradients measured at three different transects of each sampling site were recorded (wind speed averages are given as integers).

| Ecological gradients | Sampling sites |          |          |          |          |          |          |
|----------------------|----------------|----------|----------|----------|----------|----------|----------|
|                      | S1             | S2       | S3       | S4       | S5       | S6       | S7       |
| Altitude             | 1891.5         | 1896.3   | 1886.0   | 1789.6   | 1780.8   | 1789.3   | 1787.2   |
| Latitude             | 34.7033        | 34.70323 | 34.70326 | 34.69885 | 34.69549 | 34.69564 | 34.69558 |
| Longitude            | 73.61694       | 73.61694 | 73.61723 | 73.60368 | 73.59976 | 73.59962 | 73.59954 |
| Slope Angle          | 75             | 80       | 80       | 45       | 70       | 65       | 55       |
| Temp                 | 29             | 29.2     | 27.8     | 26.8     | 31.8     | 28.8     | 29.4     |
| Humidity             | 57.2           | 60.3     | 63.4     | 63.1     | 51.1     | 56       | 56.9     |
| Heat index           | 29.8           | 30.4     | 33.3     | 26.9     | 33.2     | 29.8     | 34.3     |
| Wind speed           | 1.5            | 0        | 1.5      | 1        | 1        | 2        | 3        |
| Dew point            | 20.1           | 20.3     | 21.4     | 18.6     | 19.8     | 18.9     | 21       |
| Wet bulb             | 22.6           | 22.2     | 23.8     | 20.8     | 22.9     | 22.2     | 23.3     |
| Baro Press           | 805.2          | 804.7    | 805.8    | 815.6    | 816.4    | 815.6    | 815.6    |
| Alt dens             | 9545           | 9474     | 9430     | 8950     | 9465     | 9209     | 9247     |
| pH                   | 6.5            | 6.5      | 6.4      | 6.6      | 6        | 5.9      | 5.9      |
| EC                   | 0.78           | 1.09     | 1.75     | 1.54     | 4.14     | 5.4      | 2.82     |
| OM                   | 0.85           | 1.15     | 1.37     | 0.7      | 1.08     | 1.24     | 1.25     |
| CaCO3                | 5.6            | 7.3      | 6.9      | 2.8      | 7.6      | 5.8      | 5.8      |
| K                    | 210            | 215      | 220      | 200      | 208      | 220      | 220      |
| P                    | 11             | 9        | 13       | 9.2      | 12       | 15       | 4.1      |
| Sand                 | 44             | 50       | 50       | 26.4     | 45.6     | 29.2     | 52       |
| Silt                 | 36             | 34       | 36       | 49.4     | 28.2     | 56.2     | 31       |
| Clay                 | 20             | 16       | 14       | 24.2     | 26.2     | 14.6     | 17       |
